# Supplementary material
Source: PubMed Central journal article supplement (PMC3048101)
Supplement: 1019423108_pnas.201019423SI.pdf [file 1019423108_pnas.201019423SI.pdf]

# Supporting Information

Peacock et al. 10.1073/pnas.1019423108

Table S1. Summary of genotype data for parental and progeny clones

| Clone*    | Fluorescence | Microsatellite locus <sup>†</sup> |           |           |           |
|-----------|--------------|-----------------------------------|-----------|-----------|-----------|
|           |              | II-PLC                            | IV-TB4/7  | VII-TB7/9 | IX-TB9/6  |
| J10       | None         | ab                                | ab        | aa        | ab        |
| 1738      | Red          | cd                                | cd        | bb        | cd        |
| A clone 1 | Red          | <b>bc</b>                         | <b>ac</b> | <b>ab</b> | <b>bd</b> |
| A clone 2 | None         | ab                                | ab        | aa        | ab        |
| B clone 1 | None         | <b>bd</b>                         | <b>ac</b> | <b>ab</b> | <b>ad</b> |
| B clone 2 | Red          | <b>ac</b>                         | <b>ac</b> | <b>ab</b> | <b>ac</b> |
| B clone 3 | Red          | <b>ac</b>                         | <b>ad</b> | <b>ab</b> | <b>bc</b> |

\*Crosses were (A) J10 *YFP::DMC1* × 1738 mRFP and (B) J10 *YFP::HOP1* × 1738 mRFP.

<sup>†</sup>Alleles inherited from both parents are in boldface.

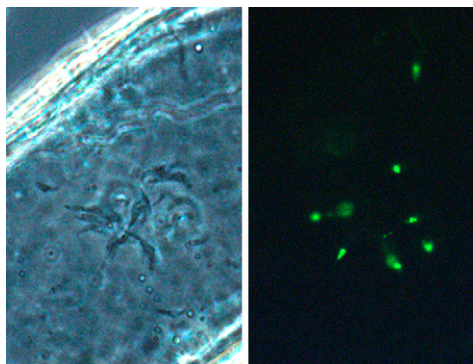

**Movie S1.** Attached epimastigotes expressing *YFP::DMC1* in a tsetse SG. A group of live attached trypanosomes with fluorescent nuclei is shown in the center of a thick-walled region of the gland dissected at 21 d postinfection. (Left) Phase contrast. (Right) Frames 1–9, epifluorescence; frames 10–13, simultaneous phase and epifluorescence.

[Movie S1](#)

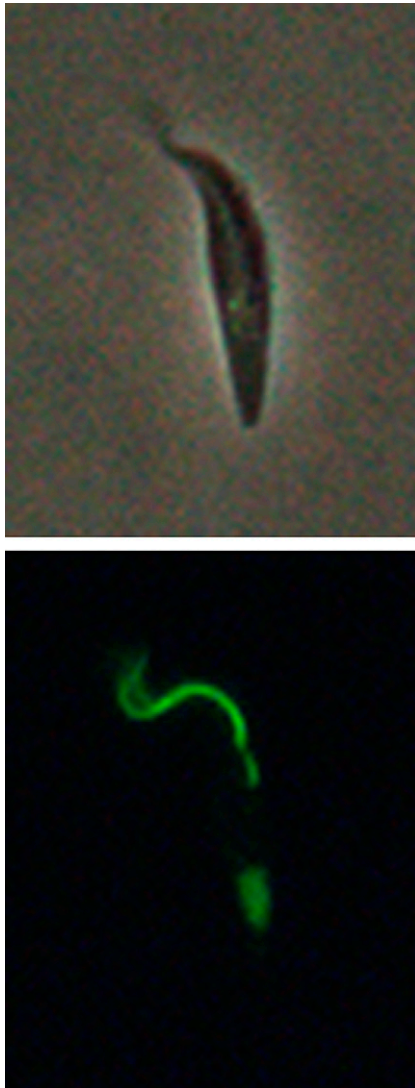

**Movie S2.** Unattached epimastigote from the SG of a tsetse fly expressing *YFP::MND1* and *YFP::PFR1*. Frames 1–6, phase; frames 7–27, epifluorescence.

[Movie S2](#)

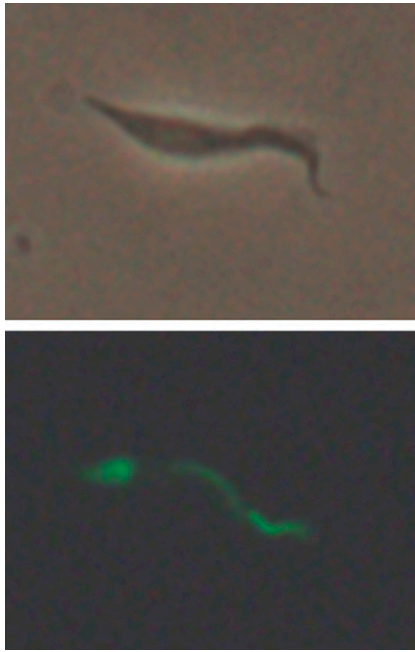

**Movie S3.** Unattached epimastigote from the SG of a tsetse fly expressing *YFP::HOPI* and *YFP::PFR1*. Frames 1–11, epifluorescence; frames 12–26, phase.

[Movie S3](#)
